# Supplementary material for: Dissociation of H2O2 on water surfaces (ice and water droplets)
Source: Royal Society of Chemistry journal article supplement (doi:10.1039/d3cp04107g), 2024-01-01
Supplement: d3cp04107g1.pdf [file d3cp04107g1.pdf]

**ESI of**

**Rapid dissociation of H<sub>2</sub>O<sub>2</sub> on the water surface**

**(ice and water droplet)**

Amit Kumar and Pradeep Kumar\*

*Department of Chemistry, Malaviya National Institute of Technology Jaipur, Jaipur,  
302017, India*

E-mail: [pradeep.chy@mnit.ac.in](mailto:pradeep.chy@mnit.ac.in)

**Sl. No.****Contents**

1. Computational details of modeling of water droplet and ice surface.
2. **Table S1:** Comparison of  $\text{H}_2\text{O}_2\text{-H}_2\text{O}$  stabilization energy ( $\text{kcal mol}^{-1}$ ) and dissociation energy ( $\text{kcal mol}^{-1}$ ) of  $\text{H}_2\text{O}_2$  obtained at different DFT functional with the experimental value.
3. **Table S2:** Intrinsic bond strength index (IBSI) values for O-O bond of  $\text{H}_2\text{O}_2$ , IBSI values for the hydrogen bonding atoms between  $\text{H}_2\text{O}$  and  $\text{H}_2\text{O}_2$ , obtained using MultiWfn code in the presence of different number of water molecules (n) estimated at LC- $\omega$ HPBE/cc-pVTZ level of theory.
4. **Table S3:** Comparison of geometrical parameters obtained at different level of theory with the result obtained at CCSD(T)/aug-cc-pVQZ level of theory.
5. **Figure S1:** Initial (W2(a)) and critical geometry (W2'(a)) of W2(a) orientation obtained during the simulation at LC- $\omega$ HPBE/GTH-PTVZ level of theory.
6. **Figure S2:** Top panel: Snapshot at different time interval for dissociation of  $\text{H}_2\text{O}_2$  on water droplet at 300 K for W2(b) orientation. Lower panel: Time evolution of the O-O bond for dissociation of  $\text{H}_2\text{O}_2$  on water droplet at 300 K for W2(b) orientation.
7. **Figure S3:** Top panel: Snapshot at different time interval for dissociation of  $\text{H}_2\text{O}_2$  on water droplet at 190 K for I1(b) orientation. Lower panel: Time evolution of the O-O bond for dissociation of  $\text{H}_2\text{O}_2$  on water droplet at 190 K for I1(b) orientation.
8. **Figure S4:** Top panel: Snapshot at different time interval for dissociation of  $\text{H}_2\text{O}_2$  on water droplet at 190 K for I2(b) orientation. Lower panel: Time evolution of the O-O bond for dissociation of  $\text{H}_2\text{O}_2$  on water droplet at 190 K for I2(b) orientation.

# 1 Computational details of modeling of water droplet and ice surface

To model the water droplet, we have consider a water cluster of 191 water molecules based on the previous studies,<sup>1-4</sup> which suggests that this size of water cluster is reasonable to include the surface effect on the reaction. To obtain the initial configuration of water droplets for BOMD simulation, the water cluster was first optimized with MD simulation using the AMBER force field followed by the full optimization at DFT functional. Further, we have relaxed the ozone molecules on the water droplets prior to the BOMD simulation. To model the ice surface, we have consider the water cluster of 270 water molecules having hexagonal structure.<sup>5-7</sup> Further, we have also optimized this ice surface using the AMBER force field method with MD simulation followed by full relaxation at DFT functional. Afterward, we have fully relaxed the ozone molecule on the ice surface using DFT functional, prior the BOMD simulation.

Table S1: Comparison of H<sub>2</sub>O<sub>2</sub>-H<sub>2</sub>O stabilization energy (kcal mol<sup>-1</sup>) and dissociation energy (kcal mol<sup>-1</sup>) of H<sub>2</sub>O<sub>2</sub> obtained at different DFT functional with the experimental value.

| Method                               | Stabilization energy | Dissociation energy |
|--------------------------------------|----------------------|---------------------|
| CCSDT/aug-cc-pVTZ//M062X/aug-cc-pVTZ | -7.54                | 45.46               |
| LC- $\omega$ HPBE/cc-pVTZ            | -8.20                | 47.97               |
| $\omega$ B97XD/cc-pVTZ               | -8.69                | 47.83               |
| LC-BLYP/cc-pVTZ                      | -11.55               | 53.35               |
| Experimental                         | -                    | 48.79               |

Table S2: Intrinsic bond strength index (IBSI) values for O-O bond of H<sub>2</sub>O<sub>2</sub>, IBSI values for the hydrogen bonding atoms between H<sub>2</sub>O and H<sub>2</sub>O<sub>2</sub>, obtained using MultiWfn code in the presence of different number of water molecules (n) estimated at LC- $\omega$ HPBE/cc-pVTZ level of theory.

| Bond                                                  | IBSI   |        |        |        |              |               |            |
|-------------------------------------------------------|--------|--------|--------|--------|--------------|---------------|------------|
|                                                       | n=0    | n=1    | n=2    | n=3    | W2(a) (n=40) | W2'(a) (n=40) | Ice (n=40) |
| O-O                                                   | 0.4410 | 0.4520 | 0.4376 | 0.4464 | 0.3449       | 0.2156        | 0.3201     |
| O(H <sub>2</sub> O)-H(H <sub>2</sub> O <sub>2</sub> ) | -      | 0.0294 | -      | -      | 0.0187       | 0.0365        | 0.0126     |
| H(H <sub>2</sub> O)-O(H <sub>2</sub> O <sub>2</sub> ) | -      | -      | -      | -      | 0.0057       | -             | 0.0186     |

Table S3: Comparison of geometrical parameters obtained at different level of theory with the result obtained at CCSD(T)/aug-cc-pVQZ level of theory.

| Geometrical parameters | $\omega$ B97XD/cc-pVTZ | LC- $\omega$ HPBE/cc-pVTZ | LC-BLYP/cc-pVTZ | CCSD(T)/aug-cc-pVQZ |
|------------------------|------------------------|---------------------------|-----------------|---------------------|
| O-H (Å)                | 0.96                   | 0.96                      | 0.96            | 0.96                |
| O-O (Å)                | 1.42                   | 1.41                      | 1.40            | 1.45                |
| H-O-O (deg.)           | 101.1                  | 101.4                     | 101.9           | 100.0               |

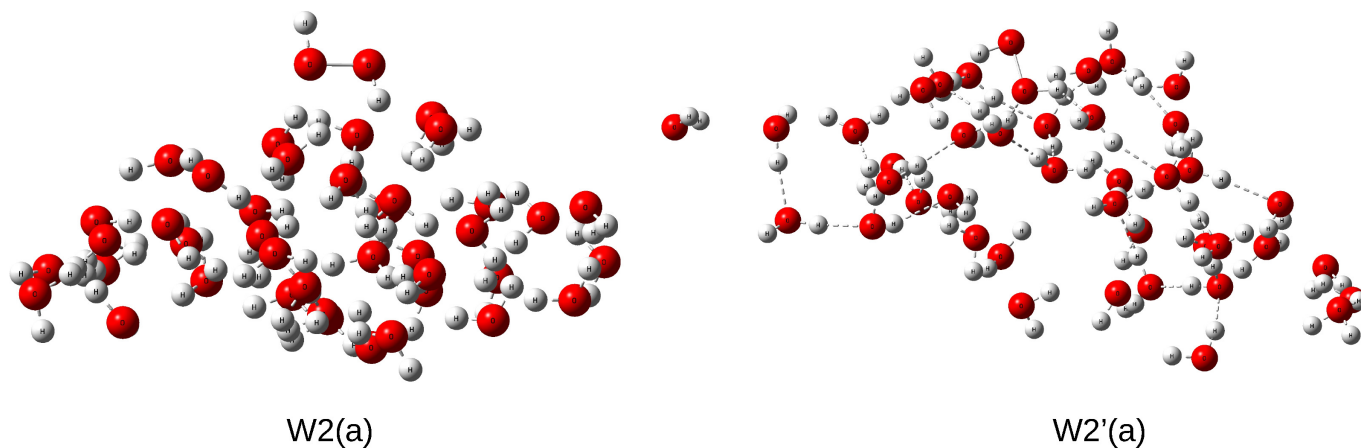

Figure S1: Initial (W2(a)) and critical geometry (W2'(a)) of W2(a) orientation obtained during the simulation at LC- $\omega$ HPBE/GTH-PTVZ level of theory.

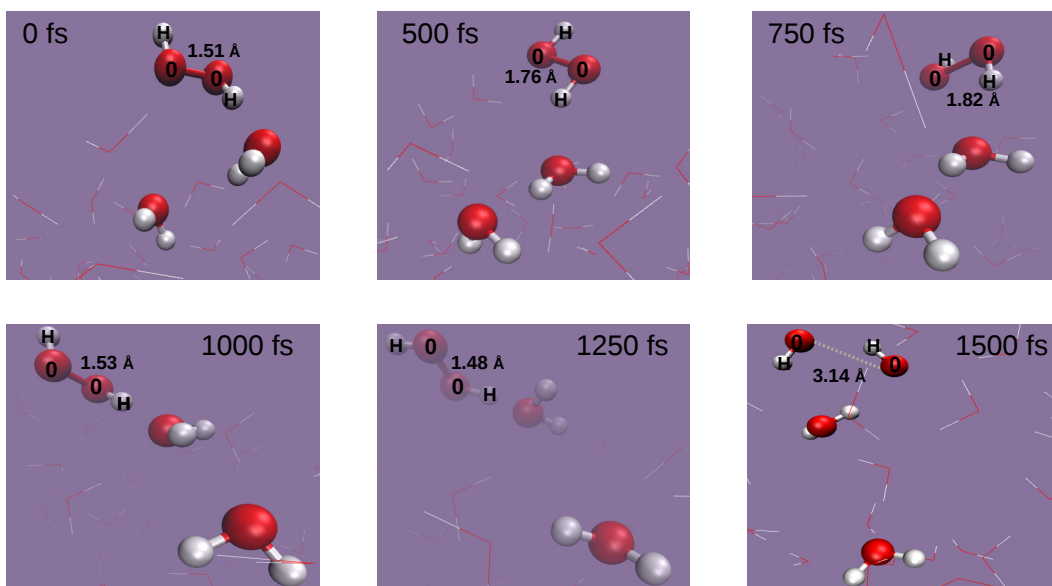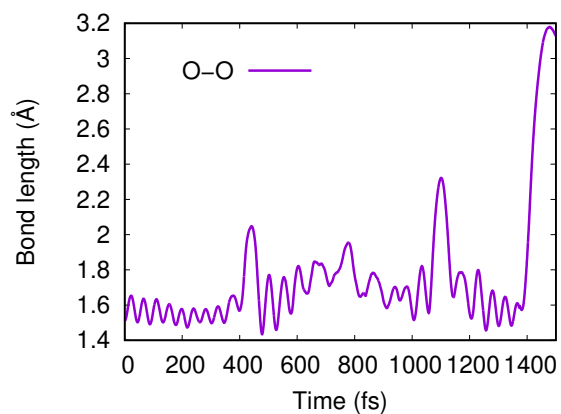

Figure S2: Top panel: Snapshot at different time interval for dissociation of  $\text{H}_2\text{O}_2$  on water droplet at 300 K for W2(b) orientation. Lower panel: Time evolution of the O-O bond for dissociation of  $\text{H}_2\text{O}_2$  on water droplet at 300 K for W2(b) orientation.

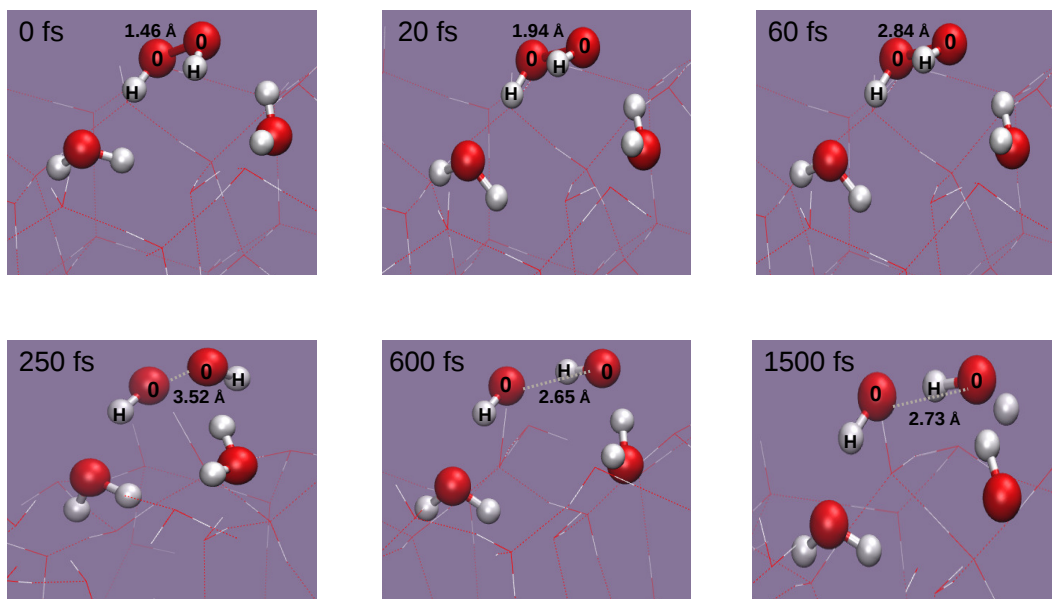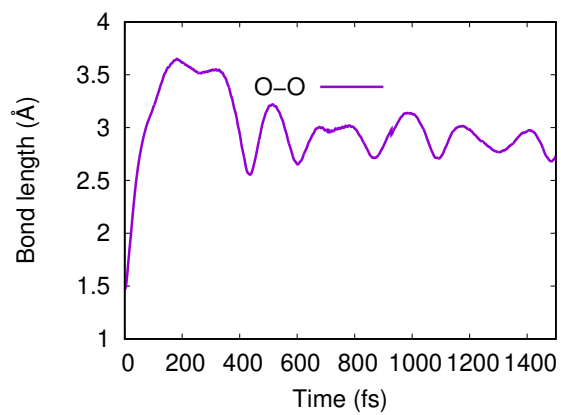

Figure S3: Top panel: Snapshot at different time interval for dissociation of  $\text{H}_2\text{O}_2$  on water droplet at 190 K for I1(b) orientation. Lower panel: Time evolution of the O-O bond for dissociation of  $\text{H}_2\text{O}_2$  on water droplet at 190 K for I1(b) orientation.

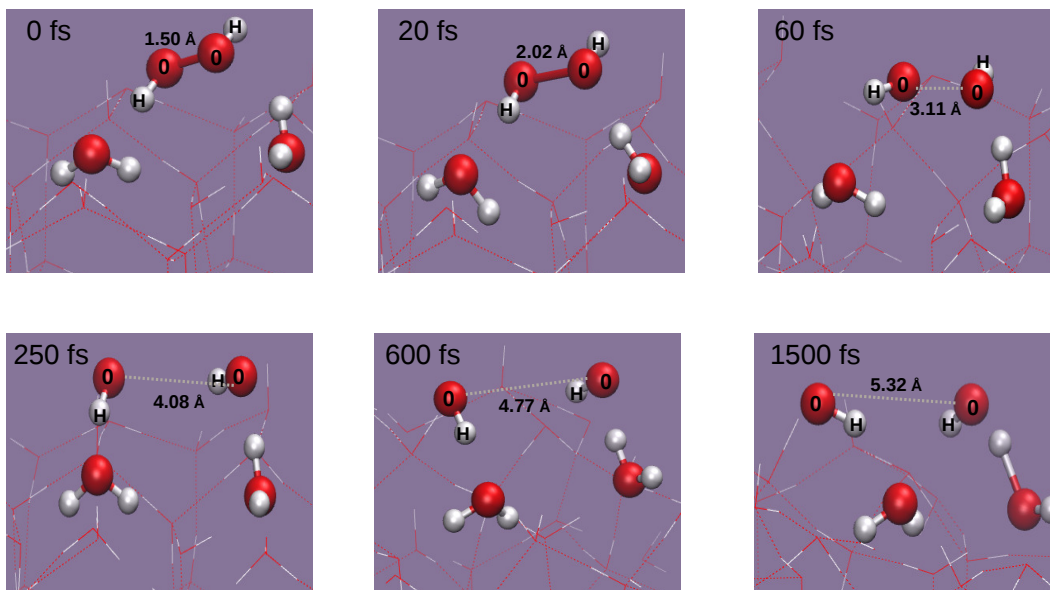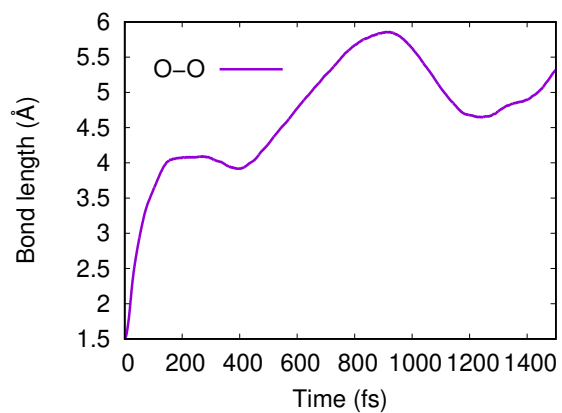

Figure S4: Top panel: Snapshot at different time interval for dissociation of  $\text{H}_2\text{O}_2$  on water droplet at 190 K for I2(b) orientation. Lower panel: Time evolution of the O-O bond for dissociation of  $\text{H}_2\text{O}_2$  on water droplet at 190 K for I2(b) orientation.



## References

- (1) Kumar, M.; Zhong, J.; Zeng, X. C.; Francisco, J. S. *J. Am. Chem. Soc.* **2018**, *140*, 4913–4921.
- (2) Zhong, J.; Li, H.; Kumar, M.; Liu, J.; Liu, L.; Zhang, X.; Zeng, X. C.; Francisco, J. S. *Angew. Chem.* **2019**, *131*, 8439–8443.
- (3) Kumar, M.; Francisco, J. S. *Chem. Sci.* **2019**, *10*, 743–751.
- (4) Mallick, S.; Kumar, P. *J. Phys. Chem. B* **2020**, *124*, 2465–2472.
- (5) Kumar, A.; Kumar, P. *J. Phys. Chem. A* **2022**, *126*, 1504–1510.
- (6) Ignatov, S. K.; Gadzhiev, O. B.; Razuvaev, A. G.; Masunov, A. E.; Schrems, O. *J. Phys. Chem. C* **2014**, *118*, 7398–7413.
- (7) Ignatov, S. K.; Gadzhiev, O. B.; Kulikov, M. Y.; Petrov, A. I.; Razuvaev, A. G.; Gand, M.; Feigin, A. M.; Schrems, O. *J. Phys. Chem. C* **2011**, *115*, 9081–9089.
